# Supplementary material
Source: ML conference proceedings conference paper supplement (https://proceedings.mlr.press/v119/goyal20b.html)
Supplement: Supplementary file 1 [file goyal20b-supp.pdf]

# PackIt: A Virtual Environment for Geometric Planning

## Supplementary Material

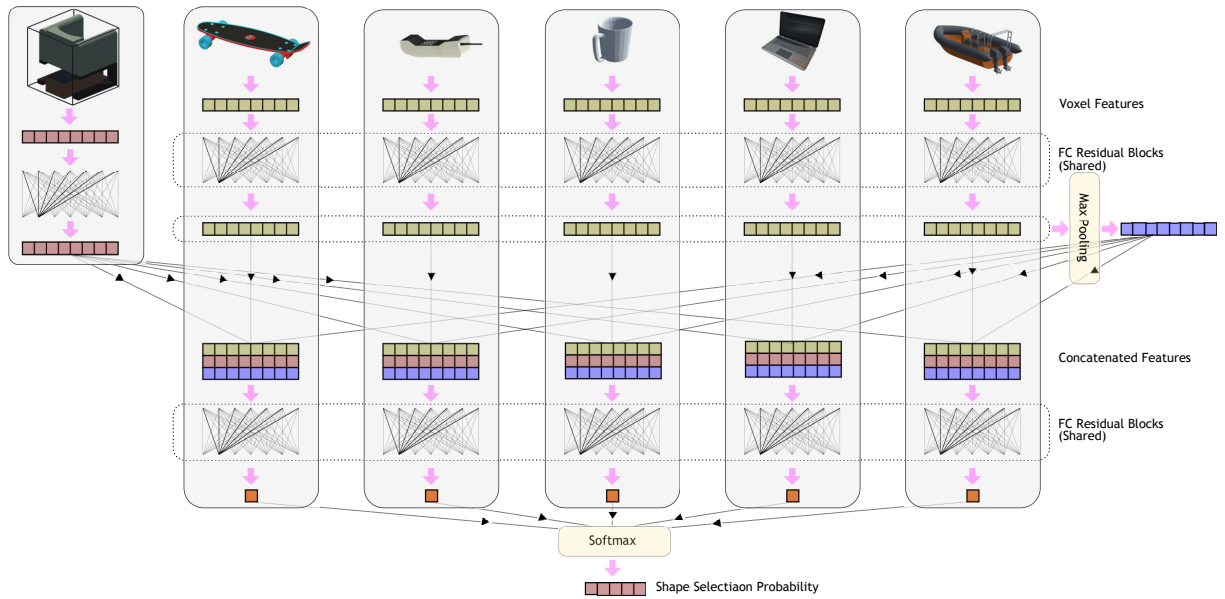

Figure 1: The proposed PackNN Neural Network for Shape Selection. Given the voxel representation of the candidate shapes and the box, PackNN outputs a probability distribution for selecting the next shape to be put in the box.
